# Supplementary material for: The Use of Poly-L-Lysine as a Capture Agent to Enhance the Detection of Antinuclear Antibodies by ELISA
Source: PubMed Central journal article supplement (PMC5017613; doi:10.1371/journal.pone.0161818), 2016-09-09
Supplement: pone.0161818.s002.pdf [file pone.0161818.s002.pdf]

Raw data for Figure 2

ELISA of directly-coated or PLL-capture nucleosomes, detected with SLE Plasmas

|                                      | SLE Plasma 1      |        | SLE Plasma 2      |        | SLE Plasma 3      |        |
|--------------------------------------|-------------------|--------|-------------------|--------|-------------------|--------|
|                                      | OD <sub>450</sub> |        | OD <sub>450</sub> |        | OD <sub>450</sub> |        |
| nucleosome coated plate              | well 1            | well 2 | well 1            | well 2 | well 1            | well 2 |
| nucleosome (DNA) (ng/ml)             |                   |        |                   |        |                   |        |
| 5,000                                | 1.485             | 1.883  | 2.085             | 2.286  | 0.452             | 0.477  |
| 2,000                                | 1.080             | 1.416  | 1.914             | 1.874  | 0.384             | 0.437  |
| 1,000                                | 0.625             | 0.844  | 1.190             | 1.108  | 0.336             | 0.354  |
| 500                                  | 0.227             | 0.314  | 0.269             | 0.253  | 0.325             | 0.303  |
| 250                                  | 0.207             | 0.239  | 0.161             | 0.144  | 0.230             | 0.278  |
| 100                                  | 0.200             | 0.182  | 0.113             | 0.124  | 0.272             | 0.279  |
| 50                                   | 0.162             | 0.139  | 0.113             | 0.104  | 0.186             | 0.245  |
| 25                                   | 0.127             | 0.118  | 0.087             | 0.089  | 0.218             | 0.238  |
| 10                                   | 0.091             | 0.090  | 0.083             | 0.079  | 0.132             | 0.198  |
| 0 (20mM Tris pH 8, 150 mM Nacl)      | 0.074             | 0.072  | 0.070             | 0.060  | 0.127             | 0.122  |
|                                      |                   |        |                   |        |                   |        |
| Poly-l-lysine coated plate           |                   |        |                   |        |                   |        |
| nucleosome (DNA) for capture (ng/ml) | well 1            | well 2 | well 1            | well 2 | well 1            | well 2 |
| 5,000                                | 3.068             | 3.100  | 3.299             | 3.285  | 0.523             | 0.510  |
| 2,000                                | 2.883             | 2.963  | 3.301             | 3.151  | 0.369             | 0.373  |
| 1,000                                | 2.366             | 2.310  | 2.665             | 2.728  | 0.305             | 0.287  |
| 500                                  | 1.286             | 1.352  | 1.664             | 1.587  | 0.270             | 0.193  |
| 250                                  | 0.518             | 0.677  | 0.490             | 0.621  | 0.181             | 0.181  |
| 100                                  | 0.308             | 0.321  | 0.261             | 0.216  | 0.266             | 0.178  |
| 50                                   | 0.179             | 0.225  | 0.147             | 0.145  | 0.196             | 0.228  |
| 25                                   | 0.147             | 0.159  | 0.127             | 0.115  | 0.211             | 0.246  |
| 10                                   | 0.129             | 0.142  | 0.123             | 0.114  | 0.170             | 0.184  |
| 0 (ELISA Dilution Buffer)            | 0.135             | 0.147  | 0.130             | 0.124  | 0.191             | 0.179  |
