# Supplementary material for: The Use of Poly-L-Lysine as a Capture Agent to Enhance the Detection of Antinuclear Antibodies by ELISA
Source: PubMed Central journal article supplement (PMC5017613; doi:10.1371/journal.pone.0161818), 2016-09-09
Supplement: pone.0161818.s008.pdf [file pone.0161818.s008.pdf]

## Raw data for Figure 7

ELISA of directly-coated or PLL-captured tetanus toxoid (tt),  
detected with SLE Plasmas

|                            | tt<br>direct coat                 | tt<br>PLL captured                | tt<br>direct coat                 | tt<br>PLL captured                | tt<br>direct coat                 | tt<br>PLL captured                |
|----------------------------|-----------------------------------|-----------------------------------|-----------------------------------|-----------------------------------|-----------------------------------|-----------------------------------|
| tetanus<br>toxoid<br>ng/ml | SLE Plasma 1<br>OD <sub>450</sub> | SLE Plasma 1<br>OD <sub>450</sub> | SLE Plasma 2<br>OD <sub>450</sub> | SLE Plasma 2<br>OD <sub>450</sub> | SLE Plasma 3<br>OD <sub>450</sub> | SLE Plasma 3<br>OD <sub>450</sub> |
| 500                        | 0.263                             | 0.085                             | 0.864                             | 0.078                             | 0.950                             | 0.090                             |
| 250                        | 0.183                             | 0.077                             | 0.769                             | 0.087                             | 0.901                             | 0.089                             |
| 100                        | 0.106                             | 0.085                             | 0.423                             | 0.076                             | 0.641                             | 0.086                             |
| 50                         | 0.065                             | 0.077                             | 0.253                             | 0.076                             | 0.334                             | 0.084                             |
| 25                         | 0.065                             | 0.081                             | 0.154                             | 0.073                             | 0.192                             | 0.085                             |
| 10                         | 0.056                             | 0.078                             | 0.102                             | 0.084                             | 0.100                             | 0.079                             |
| 5                          | 0.051                             | 0.076                             | 0.070                             | 0.076                             | 0.079                             | 0.086                             |
| 2.5                        | 0.061                             | 0.087                             | 0.054                             | 0.075                             | 0.056                             | 0.087                             |
| 1                          | 0.052                             | 0.079                             | 0.056                             | 0.078                             | 0.053                             | 0.083                             |
| 0.5                        | 0.053                             | 0.082                             | 0.059                             | 0.095                             | 0.053                             | 0.086                             |
| 0.25                       | 0.053                             | 0.081                             | 0.059                             | 0.094                             | 0.053                             | 0.079                             |
| 0                          | 0.051                             | 0.083                             | 0.051                             | 0.079                             | 0.048                             | 0.078                             |
